# Supplementary material for: Association between Dietary Patterns and Low HDL-C among Community-Dwelling Elders in North China
Source: MDPI journal article supplement (doi:10.3390/nu13103308), 2021-09-22
Supplement: s1 [file s1]

Supplemental Table S1. Pearson correlation among significant variables in the elder participants in North China (N=3,387).

|       |                | Age    | BMI    | PA     | WC     | TC     | TG     | HDL-C  | LDL-C  | SBP    | DBP    |
|-------|----------------|--------|--------|--------|--------|--------|--------|--------|--------|--------|--------|
| Age   | Coef.          | 1.000  | -0.084 | -0.192 | 0.020  | -0.059 | -0.052 | -0.037 | -0.051 | 0.104  | -0.111 |
|       | <i>P value</i> |        | <.0001 | <.0001 | 0.253  | 0.001  | 0.003  | 0.032  | 0.003  | <.0001 | <.0001 |
| BMI   | Coef.          | -0.084 | 1.000  | -0.073 | 0.679  | 0.127  | 0.246  | -0.241 | 0.204  | 0.181  | 0.192  |
|       | <i>P value</i> | <.0001 |        | <.0001 | <.0001 | <.0001 | <.0001 | <.0001 | <.0001 | <.0001 | <.0001 |
| PA    | Coef.          | -0.192 | -0.073 | 1.000  | -0.094 | -0.037 | -0.064 | 0.059  | -0.047 | -0.055 | -0.039 |
|       | <i>P value</i> | <.0001 | <.0001 |        | <.0001 | 0.031  | 0.000  | 0.001  | 0.006  | 0.001  | 0.025  |
| WC    | Coef.          | 0.020  | 0.679  | -0.094 | 1.000  | 0.099  | 0.222  | -0.259 | 0.169  | 0.180  | 0.173  |
|       | <i>P value</i> | 0.253  | <.0001 | <.0001 |        | <.0001 | <.0001 | <.0001 | <.0001 | <.0001 | <.0001 |
| TC    | Coef.          | -0.059 | 0.127  | -0.037 | 0.099  | 1.000  | 0.295  | 0.313  | 0.931  | 0.101  | 0.063  |
|       | <i>P value</i> | 0.001  | <.0001 | 0.031  | <.0001 |        | <.0001 | <.0001 | <.0001 | <.0001 | 0.000  |
| TG    | Coef.          | -0.052 | 0.246  | -0.064 | 0.222  | 0.295  | 1.000  | -0.380 | 0.272  | 0.094  | 0.054  |
|       | <i>P value</i> | 0.003  | <.0001 | 0.000  | <.0001 | <.0001 |        | <.0001 | <.0001 | <.0001 | 0.002  |
| HDL-C | Coef.          | -0.037 | -0.241 | 0.059  | -0.259 | 0.313  | -0.380 | 1.000  | 0.072  | -0.005 | -0.021 |
|       | <i>P value</i> | 0.032  | <.0001 | 0.001  | <.0001 | <.0001 | <.0001 |        | <.0001 | 0.751  | 0.215  |
| LDL-C | Coef.          | -0.051 | 0.204  | -0.047 | 0.169  | 0.931  | 0.272  | 0.072  | 1.000  | 0.089  | 0.071  |
|       | <i>P value</i> | 0.003  | <.0001 | 0.006  | <.0001 | <.0001 | <.0001 | <.0001 |        | <.0001 | <.0001 |
| SBP   | Coef.          | 0.104  | 0.181  | -0.055 | 0.180  | 0.101  | 0.094  | -0.005 | 0.089  | 1.000  | 0.551  |
|       | <i>P value</i> | <.0001 | <.0001 | 0.001  | <.0001 | <.0001 | <.0001 | 0.751  | <.0001 |        | <.0001 |
| DBP   | Coef.          | -0.111 | 0.192  | -0.039 | 0.173  | 0.063  | 0.054  | -0.021 | 0.071  | 0.551  | 1.000  |
|       | <i>P value</i> | <.0001 | <.0001 | 0.025  | <.0001 | 0.000  | 0.002  | 0.215  | <.0001 | <.0001 |        |

TC: total cholesterol; TG: triglyceride; HDL-C: high-density lipoprotein cholesterol; LDL-C: low-density lipoprotein cholesterol; BMI: body mass index; WC: waist circumference; PA: physical activity of median and high intensity (minutes per week)
